# Supplementary material for: Effect of morphology on larvicidal activity of chemically synthesized zinc oxide nanoparticles against mosquito vectors
Source: Royal Society of Chemistry journal article supplement (doi:10.1039/d1ra00014d), 2021-01-01
Supplement: d1ra00014d1.pdf [file d1ra00014d1.pdf]

## Supporting information

### Effect of Morphology on Larvicidal activity of chemically synthesized zinc oxide nanoparticles against mosquito vectors

U.M.T.M Gunathilaka,<sup>a,b,c</sup> W.A.P.P.de Silva,<sup>b,c</sup> S.P. Dunuweera,<sup>a,c</sup> and R.M.G. Rajapakse<sup>\*a,c</sup>

<sup>a</sup>Department of Chemistry, University of Peradeniya, Peradeniya 20400, Sri Lanka.

<sup>b</sup>Department of Zoology, University of Peradeniya, Peradeniya 20400, Sri Lanka.

<sup>c</sup>Postgraduate Institute of Science, University of Peradeniya, Peradeniya 20400, Sri Lanka.

## Table of contents

**Figure.S1:** XRF report of zinc oxide nanoparticles. (a) Star shape, (b) Needle shape, (c) Plate shape, (d) Cubic shape

**Figure.S2:** EDX spectrum of zinc oxide nanoparticles. (a) Star shape, (b) Needle shape, (c) Plate shape, (d) Cubic shape

**Table S1:** Mean mortality of *Aedes albopictus* mosquito larvae when exposed to different concentrations of four different morphologies of ZnO NPs

**Table S2:** Mean mortality of *Anopheles vagus* mosquito larvae when exposed to different concentration of four different morphologies of ZnO NPs

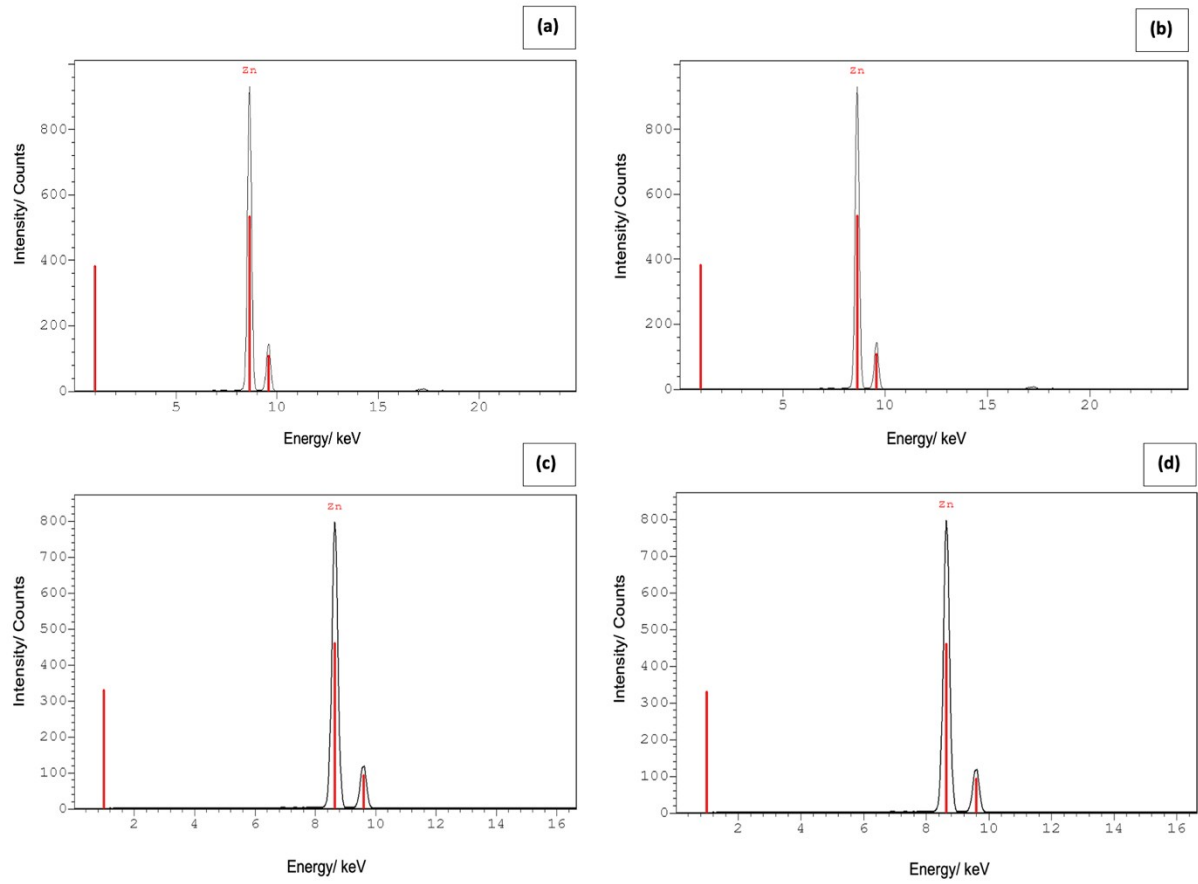

**Figure.S1:** XRF report of zinc oxide nanoparticles. (a) Star shape, (b) Needle shape, (c) Plate shape, (d) Cubic shape

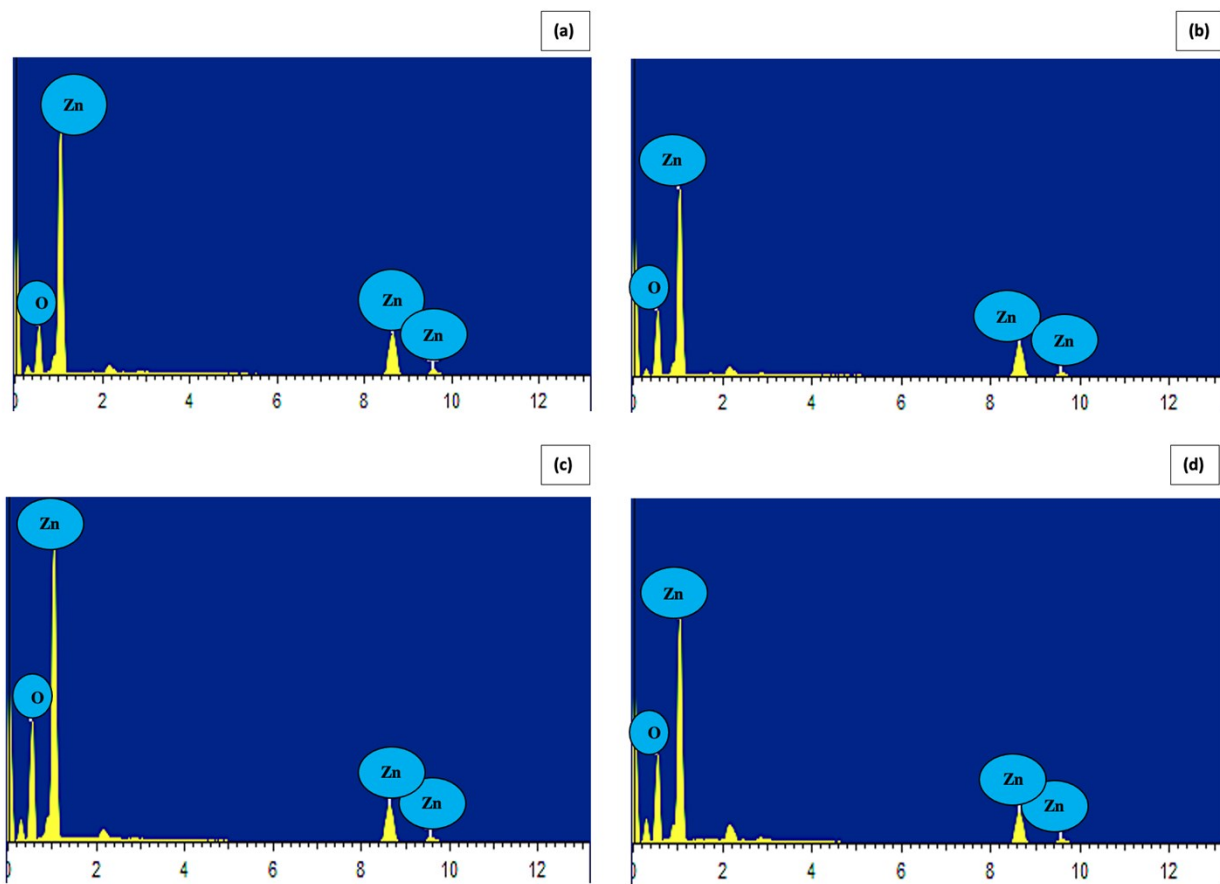

**Figure.S2:** EDX spectrum of zinc oxide nanoparticles. (a) Star shape, (b) Needle shape, (c) Plate shape, (d) Cubic shape

**Table S1:** Mean mortality of *Aedes albopictus* mosquito larvae when exposed to different concentrations of four different morphologies of ZnO NPs

| Test sample nanoparticles | Concentrations (mg/L) | Mean mortality | LC <sub>50</sub> (mg/L) | R     | Regression equation |
|---------------------------|-----------------------|----------------|-------------------------|-------|---------------------|
| Star shape                | 25                    | 40.0 ± 0.57    | 38.90                   | 0.807 | Y = 1.986X + 1.841  |
|                           | 50                    | 53.0 ± 0.67    |                         |       |                     |
|                           | 75                    | 60.0 ± 0.57    |                         |       |                     |
|                           | 100                   | 87.0 ± 0.33    |                         |       |                     |
| Needle shape              | 25                    | 40.0 ± 0.57    | 47.53                   | 0.831 | Y = 1.189X + 3.005  |
|                           | 50                    | 43.0 ± 0.88    |                         |       |                     |
|                           | 75                    | 63.0 ± 0.67    |                         |       |                     |
|                           | 100                   | 67.0 ± 0.88    |                         |       |                     |
| Plate shape               | 25                    | 30.0 ± 0.57    | 68.38                   | 0.992 | Y = 1.230X + 2.743  |
|                           | 50                    | 43.0 ± 0.88    |                         |       |                     |
|                           | 75                    | 50.0 ± 0.57    |                         |       |                     |
|                           | 100                   | 60.0 ± 0.57    |                         |       |                     |
| Cubic shape               | 25                    | 27.0 ± 0.33    | 50.24                   | 0.933 | Y = 2.653X + 0.487  |
|                           | 50                    | 40.0 ± 0.57    |                         |       |                     |
|                           | 75                    | 60.0 ± 0.57    |                         |       |                     |
|                           | 100                   | 73.0 ± 0.33    |                         |       |                     |

LC<sub>50</sub>: lethal dose to kill 50% of the exposed larvae, significant at P < 0.05 level; R: correlation coefficient

**Table S2:** Mean mortality of *Anopheles vagus* mosquito larvae when exposed to different concentration of four different morphologies of ZnO NPs

| Test sample nanoparticles | Concentrations (mg/L) | Mean Mortality | LC <sub>50</sub> (mg/L) | R     | Regression equation |
|---------------------------|-----------------------|----------------|-------------------------|-------|---------------------|
| Star shape                | 25                    | 83.0 ± 0.33    | 4.78                    | 0.886 | Y = 1.191X + 4.190  |
|                           | 50                    | 87.0 ± 0.33    |                         |       |                     |
|                           | 75                    | 90.0 ± 0.57    |                         |       |                     |
|                           | 100                   | 97.0 ± 0.33    |                         |       |                     |
| Needle shape              | 25                    | 70.0 ± 0.57    | 6.51                    | 0.995 | Y = 0.913X + 4.257  |
|                           | 50                    | 80.0 ± 0.57    |                         |       |                     |
|                           | 75                    | 83.0 ± 0.33    |                         |       |                     |
|                           | 100                   | 87.0 ± 0.33    |                         |       |                     |
| Plate shape               | 25                    | 67.0 ± 0.33    | 13.64                   | 0.976 | Y = 1.378X + 3.436  |
|                           | 50                    | 76.0 ± 0.33    |                         |       |                     |
|                           | 75                    | 83.0 ± 0.33    |                         |       |                     |
|                           | 100                   | 90.0 ± 0.57    |                         |       |                     |
| Cubic shape               | 25                    | 77.0 ± 0.33    | 10.47                   | 0.941 | Y = 1.624X + 3.343  |
|                           | 50                    | 83.0 ± 0.33    |                         |       |                     |
|                           | 75                    | 90.0 ± 0.57    |                         |       |                     |
|                           | 100                   | 97.0 ± 0.33    |                         |       |                     |

LC<sub>50</sub>: lethal dose to kill 50% of the exposed larvae, significant at P < 0.05 level; R: correlation coefficient
